# Supplementary material for: Isolation and Identification of a Novel Anti-Dry Eye Peptide from Tilapia Skin Peptides Based on In Silico, In Vitro, and In Vivo Approaches
Source: MDPI journal article supplement (doi:10.3390/ijms241612772), 2023-08-14
Supplement: s1 [file s1]

# Isolation and Identification of a Novel Anti-Dry Eye Peptide from Tilapia Skin Peptides Based on In Silico, In Vitro, and In Vivo Approaches

Jian Zeng <sup>1</sup>, Cuixian Lin <sup>1</sup>, Shilin Zhang <sup>1</sup>, Haowen Yin <sup>1,2</sup>, Kaishu Deng <sup>1</sup>, Zhiyou Yang <sup>1</sup>,  
Yongping Zhang <sup>1</sup>, You Liu <sup>1</sup>, Chuanyin Hu <sup>3,\*</sup> and Yun-Tao Zhao <sup>1,\*</sup>

<sup>1</sup> College of Food Science and Technology, Modern Biochemistry Experimental Center, Guangdong Ocean University, Guangdong Province Engineering Laboratory for Marine Biological Products, Guangdong Provincial Key Laboratory of Aquatic Product Processing and Safety, Zhanjiang 524088, China

<sup>2</sup> College of Food Science and Engineering, Ocean University of China, Yu-Shan Road, Qingdao 266003, China

<sup>3</sup> Department of Biology, Guangdong Medical University, Zhanjiang, 524023, China

\* Correspondence: [huchuanyin@gdmu.edu.cn](mailto:huchuanyin@gdmu.edu.cn) or [hucyin@126.com](mailto:hucyin@126.com) (C.H.); [zhaoyt@gdou.edu.cn](mailto:zhaoyt@gdou.edu.cn) (Y.-T.Z.).

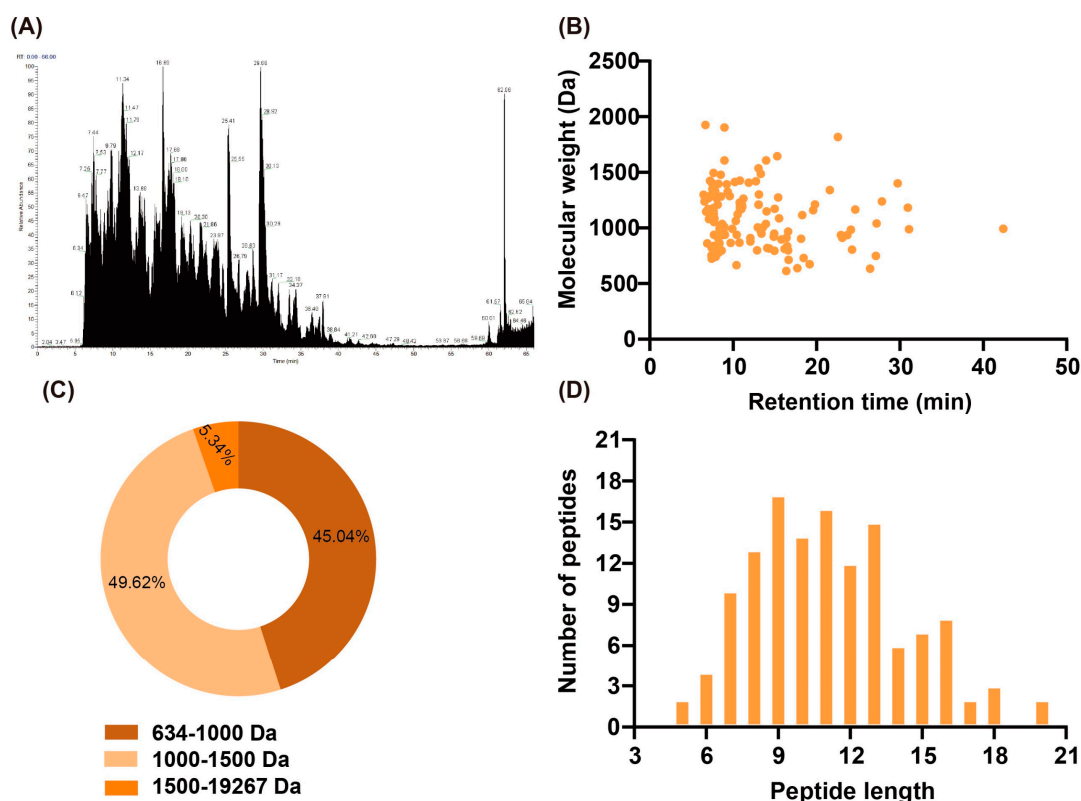

**Figure. S1** Result of LC/MS/MS identification of tilapia skin peptides-II (TSP-II). **(A)** Total ion flow diagram of TSP-II; **(B,C)**. Distribution of molecular weight of TSP-II. **(D)** Distribution of the length of amino acids for TSP-II.

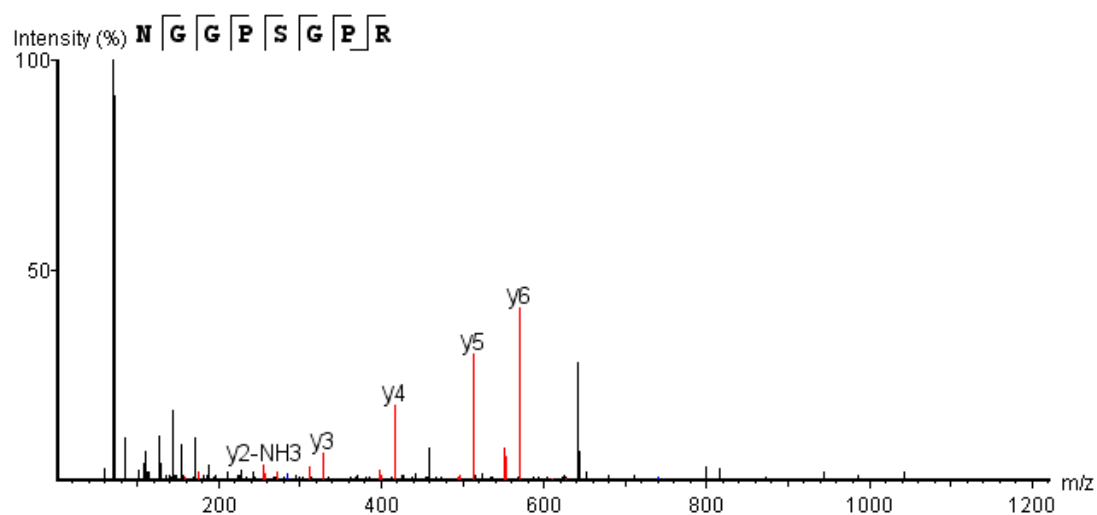

**Figure. S2** The result of LC/MS/MS for NGGPSGPR (NGG).

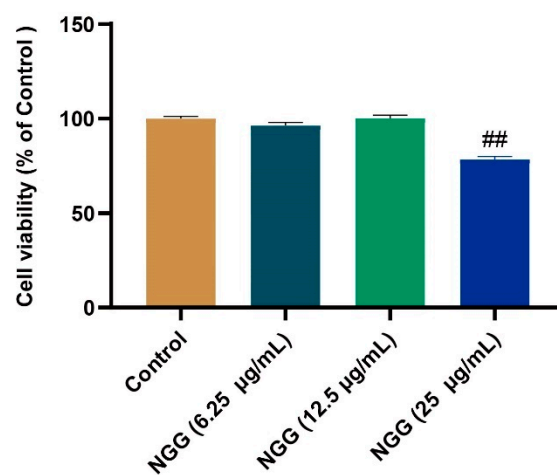

**Figure. S3** Results of toxicity of NGG on Human corneal epithelial cells.  $n = 5$ , <sup>##</sup> $p < 0.01$ , vs control group.

**Table S1.** Sequence of TSP-II and its prediction by PeptideRanker and ToxinPred.

| NO. | Peptide Sequence | Mass (Da) | PeptideRanker Score | ToxinPred |
|-----|------------------|-----------|---------------------|-----------|
| 1   | GPAGGPLGPR       | 877.4769  | 0.899783            | Non-Toxin |
| 2   | AGPGAGPLGPR      | 948.514   | 0.898817            | Non-Toxin |
| 3   | GPAGPAGPGGPPSGR  | 1230.6104 | 0.885754            | Non-Toxin |
| 4   | AGPRGPAGPSGLR    | 1191.6472 | 0.884835            | Non-Toxin |
| 5   | DFCPPGFNTK       | 1181.5176 | 0.88423             | Non-Toxin |
| 6   | QGPAGGPLGPR      | 1005.5355 | 0.880138            | Non-Toxin |
| 7   | KAPDPF           | 673.3435  | 0.867679            | Non-Toxin |
| 8   | SGPAGPAGPGGPPRQ  | 1301.6475 | 0.861916            | Non-Toxin |
| 9   | QSGPAGPAGPGGPPQR | 1486.7275 | 0.841318            | Non-Toxin |
| 10  | SDFPALR          | 804.413   | 0.832621            | Non-Toxin |
| 11  | AGPEGPLGPR       | 949.4981  | 0.811454            | Non-Toxin |

|    |                      |           |          |           |
|----|----------------------|-----------|----------|-----------|
| 12 | AGPSGPAGRP           | 865.4406  | 0.807969 | Non-Toxin |
| 13 | QGGGPQGPVGTGPKG      | 1406.6902 | 0.790962 | Non-Toxin |
| 14 | GPAGPAGRPGPSGE       | 1205.5789 | 0.784207 | Non-Toxin |
| 15 | VFPGLPDHL            | 993.5283  | 0.776531 | Non-Toxin |
| 16 | GPAGPRGPA            | 778.4085  | 0.762096 | Non-Toxin |
| 17 | PGPSGPKGEPGAK        | 1177.6091 | 0.762084 | Non-Toxin |
| 18 | GPPGTPGSPGPGFEGGKPQ  | 1816.8743 | 0.760928 | Non-Toxin |
| 19 | NSAGPQGPLGPR         | 1149.5891 | 0.751392 | Non-Toxin |
| 20 | GPAGPRSGPGAA         | 993.4991  | 0.742922 | Non-Toxin |
| 21 | GPSGPRGPA            | 794.4034  | 0.742249 | Non-Toxin |
| 22 | QHGPSGPRGPAGPHGPVGKD | 1903.9402 | 0.740727 | Non-Toxin |
| 23 | GPRGPAGPHGPVGKD      | 1397.7163 | 0.732285 | Non-Toxin |
| 24 | GPSGRPGPAGPH         | 1085.5366 | 0.722768 | Non-Toxin |
| 25 | AGPAGPRGSPGA         | 993.4991  | 0.71577  | Non-Toxin |
| 26 | AGPRGASGPAGPR        | 1149.6003 | 0.70826  | Non-Toxin |
| 27 | LGPAGPR              | 666.3813  | 0.705134 | Non-Toxin |
| 28 | AGPAGPRGSPGAA        | 1064.5361 | 0.704227 | Non-Toxin |
| 29 | NPSGPGGPTGKDGAGR     | 1423.6804 | 0.701498 | Non-Toxin |
| 30 | NPAGPAGPRGPSGE       | 1262.6003 | 0.695935 | Non-Toxin |
| 31 | FGPGADNAGGK          | 989.4566  | 0.690454 | Non-Toxin |
| 32 | QAGPAGPR             | 752.3929  | 0.683607 | Non-Toxin |
| 33 | GPAGPRGPS            | 794.4034  | 0.681857 | Non-Toxin |
| 34 | SGPAGPRGPSGS         | 1025.489  | 0.679261 | Non-Toxin |
| 35 | KAPDPLRGGHY          | 1209.6255 | 0.673412 | Non-Toxin |
| 36 | AHGPSGPRGPAGPH       | 1293.6326 | 0.666935 | Non-Toxin |
| 37 | QAGPAGPRGSPGAA       | 1192.5947 | 0.665539 | Non-Toxin |
| 38 | QAGPAGPRGSPGA        | 1121.5576 | 0.66391  | Non-Toxin |
| 39 | AAGPSGPRGPA          | 936.4777  | 0.66159  | Non-Toxin |
| 40 | TGGPQGGLGPR          | 1035.5461 | 0.661556 | Non-Toxin |
| 41 | GAHGPSGRPGPAGPH      | 1350.6541 | 0.654835 | Non-Toxin |
| 42 | DFLLK                | 634.369   | 0.654617 | Non-Toxin |
| 43 | GPMGPRGPGPPPSSGPQ    | 1644.7678 | 0.649798 | Toxin     |
| 44 | NGGPSGPR             | 740.3565  | 0.648295 | Non-Toxin |
| 45 | GPAGPRGPSGE          | 980.4675  | 0.644932 | Non-Toxin |
| 46 | LDMLGPR              | 816.4164  | 0.643629 | Non-Toxin |

|    |                  |           |          |           |
|----|------------------|-----------|----------|-----------|
| 47 | EAPDPLRN         | 910.4508  | 0.640178 | Non-Toxin |
| 48 | GPSGPQGSRGEPGPN  | 1392.6382 | 0.63726  | Non-Toxin |
| 49 | NVGEPGRLF        | 987.5137  | 0.627502 | Non-Toxin |
| 50 | NNPDPLRGGHY      | 1238.5791 | 0.626809 | Non-Toxin |
| 51 | QPPGPTGAP        | 820.4079  | 0.620057 | Non-Toxin |
| 52 | KAPDPLRNHY       | 1209.6255 | 0.616423 | Non-Toxin |
| 53 | QHGGPSRPGGAGHP   | 1407.6755 | 0.613812 | Non-Toxin |
| 54 | GPAGVRGPAGPA     | 1005.5355 | 0.610344 | Non-Toxin |
| 55 | GPAGPRGSPGSN     | 1052.4998 | 0.591846 | Non-Toxin |
| 56 | PAGGSPRGPA       | 865.4406  | 0.582409 | Non-Toxin |
| 57 | GPAGPRGSPGS      | 938.457   | 0.581542 | Non-Toxin |
| 58 | QPVGEPGKGAGSPSGE | 1606.7585 | 0.571822 | Non-Toxin |
| 59 | EAPDPLRNHY       | 1210.573  | 0.554447 | Non-Toxin |
| 60 | QPGTAAGPGR       | 910.462   | 0.552907 | Non-Toxin |
| 61 | GPVGEPGKQGSPSGE  | 1535.7214 | 0.550743 | Non-Toxin |
| 62 | NAPGPGGPTGKDGARQ | 1478.7227 | 0.534334 | Non-Toxin |
| 63 | QPVGEPGKGAGPSGPS | 1420.6946 | 0.520827 | Non-Toxin |
| 64 | NPSGPGGPTGKDAGQR | 1494.7175 | 0.505074 | Non-Toxin |
| 65 | AGPVGEPGKGA      | 938.4821  | 0.503477 | Non-Toxin |
| 66 | VGAGPSGPR        | 796.4191  | 0.490303 | Non-Toxin |
| 67 | TSQFADRL         | 936.4665  | 0.484124 | Non-Toxin |
| 68 | KLPALPAK         | 836.5483  | 0.470238 | Non-Toxin |
| 69 | NPAGPRGPSGE      | 1037.489  | 0.469391 | Non-Toxin |
| 70 | QGGVGELPGR       | 968.5039  | 0.469341 | Non-Toxin |
| 71 | QPTAPDGQPGAK     | 1165.5728 | 0.467289 | Non-Toxin |
| 72 | AGPRGPDSGPSQR    | 1280.6221 | 0.465836 | Non-Toxin |
| 73 | DDVVRF           | 749.3708  | 0.464564 | Non-Toxin |
| 74 | SGLDGAKGDSGPAGPK | 1412.6895 | 0.461318 | Non-Toxin |
| 75 | FGGRGEPGPAQR     | 1227.6108 | 0.458999 | Non-Toxin |
| 76 | HGPVGKDHS GPGR   | 1299.6431 | 0.451958 | Non-Toxin |
| 77 | GLDGAKGDSGPAGPK  | 1325.6575 | 0.442598 | Non-Toxin |
| 78 | GPVGKDGRGPAH     | 1146.5894 | 0.439001 | Non-Toxin |
| 79 | QNAPGPGGPTGKDQRQ | 1606.7812 | 0.427997 | Non-Toxin |
| 80 | SGLDGAKGDTGPAGPK | 1426.7051 | 0.427327 | Non-Toxin |
| 81 | EEAPDPLRNHY      | 1339.6157 | 0.41707  | Non-Toxin |

|     |                     |           |          |           |
|-----|---------------------|-----------|----------|-----------|
| 82  | GPVGNTGPK           | 825.4344  | 0.4108   | Non-Toxin |
| 83  | GPHGVPGKD           | 862.4297  | 0.409573 | Non-Toxin |
| 84  | NGVGELPGR           | 897.4668  | 0.402994 | Non-Toxin |
| 85  | LDGAKGDSGPAGPK      | 1268.636  | 0.397137 | Non-Toxin |
| 86  | RGTGPVGMSPGR        | 1170.5928 | 0.381551 | Non-Toxin |
| 87  | DAGKTLPR            | 856.4766  | 0.378726 | Non-Toxin |
| 88  | KGEPGHHKGPDRHTSDGPR | 1926.9409 | 0.375891 | Non-Toxin |
| 89  | DGAKGDTGPAGPK       | 1169.5676 | 0.374624 | Non-Toxin |
| 90  | VRPPAGK             | 723.4391  | 0.356249 | Non-Toxin |
| 91  | RPPAGKD             | 739.3976  | 0.355871 | Non-Toxin |
| 92  | RNGGPEGPAGAR        | 1137.564  | 0.352671 | Non-Toxin |
| 93  | LLAPPER             | 794.465   | 0.351403 | Non-Toxin |
| 94  | LDGAKGDTGPAGPK      | 1282.6516 | 0.344193 | Non-Toxin |
| 95  | VSPDMTSLPTLPK       | 1400.7222 | 0.332511 | Non-Toxin |
| 96  | RNGPEGPAGAR         | 1080.5425 | 0.330769 | Non-Toxin |
| 97  | VKLPAIPAK           | 935.6168  | 0.319142 | Non-Toxin |
| 98  | TEPVLPPSKSL         | 1166.6545 | 0.317239 | Non-Toxin |
| 99  | DRGKGEPGAAGPK       | 1238.6367 | 0.315499 | Non-Toxin |
| 100 | LLAPPERKY           | 1085.6233 | 0.312105 | Non-Toxin |
| 101 | EGPKGNGRGETGPA      | 1268.6108 | 0.307589 | Non-Toxin |
| 102 | VVRPPAGK            | 822.5075  | 0.298109 | Non-Toxin |
| 103 | AVLLPK              | 639.4319  | 0.297171 | Non-Toxin |
| 104 | SLGGASGTSAMKQ       | 1209.5659 | 0.296767 | Non-Toxin |
| 105 | LEEPGLR             | 812.4391  | 0.294498 | Non-Toxin |
| 106 | VRPAPGKD            | 838.4661  | 0.286871 | Non-Toxin |
| 107 | TGPAGRSPDAGAA       | 1126.5366 | 0.286774 | Non-Toxin |
| 108 | GEEGKRGPTGELG       | 1285.6262 | 0.261458 | Non-Toxin |
| 109 | DVSGGYDEYR          | 1159.478  | 0.258236 | Non-Toxin |
| 110 | DLGDDKVRLS          | 1116.5774 | 0.257807 | Non-Toxin |
| 111 | NPVGNTGPKGA         | 1010.5145 | 0.253624 | Non-Toxin |
| 112 | LDPDTAYK            | 921.4443  | 0.250948 | Non-Toxin |
| 113 | VAPLDHVV            | 912.4705  | 0.246187 | Non-Toxin |
| 114 | LLAPPERKYS          | 1172.6553 | 0.239179 | Non-Toxin |
| 115 | AKDPQSDTGTVGR       | 1330.6477 | 0.237518 | Non-Toxin |
| 116 | TSPVGPTGKP          | 939.5025  | 0.234554 | Non-Toxin |

|     |             |           |           |           |
|-----|-------------|-----------|-----------|-----------|
| 117 | TEAPLNPK    | 868.4654  | 0.220992  | Non-Toxin |
| 118 | VLGLGTR     | 714.4388  | 0.20242   | Non-Toxin |
| 119 | RVRPPAGKD   | 994.5671  | 0.195985  | Non-Toxin |
| 120 | VVRPPAGKD   | 937.5345  | 0.195649  | Non-Toxin |
| 121 | KVLPVGKY    | 902.5589  | 0.177888  | Non-Toxin |
| 122 | LPDTPKE     | 798.4123  | 0.172989  | Non-Toxin |
| 123 | VLLDR       | 614.3751  | 0.161797  | Non-Toxin |
| 124 | LDGYPKPVKEE | 1273.6553 | 0.158243  | Non-Toxin |
| 125 | LDLVDR      | 729.4021  | 0.156631  | Non-Toxin |
| 126 | SVDDGKDRVS  | 1076.5098 | 0.142525  | Non-Toxin |
| 127 | TDLPKVQ     | 799.444   | 0.0882873 | Non-Toxin |
| 128 | TVPTLPKET   | 984.5491  | 0.0878987 | Non-Toxin |
| 129 | ELTDLPKVQ   | 1041.5706 | 0.0848902 | Non-Toxin |
| 130 | LTGEPHAV    | 909.4556  | 0.0825041 | Non-Toxin |
| 131 | REVLDSVR    | 972.5352  | 0.0754738 | Non-Toxin |

**Table S2.** Results of TSP-II screened by ToxinPred and PeptideRanker.

| NO. | Peptide              | Length | Mass (Da) | ToxinPred | Peptide Ranker Score |
|-----|----------------------|--------|-----------|-----------|----------------------|
| 1   | GPAGGPLGPR           | 10     | 877.48    | Non-Toxin | 0.8998               |
| 2   | AGPGAGPLGPR          | 11     | 948.51    | Non-Toxin | 0.8988               |
| 3   | GPAGPAGPGPPSGR       | 15     | 1230.61   | Non-Toxin | 0.8858               |
| 4   | AGPRGPAGPSGLR        | 13     | 1191.65   | Non-Toxin | 0.8848               |
| 5   | DFCPPGFNTK           | 10     | 1181.52   | Non-Toxin | 0.8842               |
| 6   | QGPAGGPLGPR          | 11     | 1005.54   | Non-Toxin | 0.8801               |
| 7   | KAPDPF               | 6      | 673.34    | Non-Toxin | 0.8677               |
| 8   | SGPAGPAGPGPPRQ       | 15     | 1301.65   | Non-Toxin | 0.8619               |
| 9   | QGSGPAGPAGPGPPQR     | 17     | 1486.73   | Non-Toxin | 0.8413               |
| 10  | SDFPALR              | 7      | 804.41    | Non-Toxin | 0.8326               |
| 11  | AGPEGPLGPR           | 10     | 949.50    | Non-Toxin | 0.8115               |
| 12  | AGPSGPAGRP           | 10     | 865.44    | Non-Toxin | 0.8080               |
| 13  | QGGGPQGPVGNTGPKG     | 16     | 1406.69   | Non-Toxin | 0.7910               |
| 14  | GPAGPAGRPGPSGE       | 14     | 1205.58   | Non-Toxin | 0.7842               |
| 15  | VFPGLPDHL            | 9      | 993.53    | Non-Toxin | 0.7765               |
| 16  | GPAGPRGPA            | 9      | 778.41    | Non-Toxin | 0.7621               |
| 17  | PGPSGPKGEPGAK        | 13     | 1177.61   | Non-Toxin | 0.7621               |
| 18  | GPPGTPGSPGPPGFEGGKPQ | 20     | 1816.87   | Non-Toxin | 0.7609               |
| 19  | NSAGPQGGLGPR         | 12     | 1149.59   | Non-Toxin | 0.7514               |
| 20  | GPAGPRSGPGAA         | 12     | 993.50    | Non-Toxin | 0.7429               |
| 21  | GPSGPRGPA            | 9      | 794.40    | Non-Toxin | 0.7422               |
| 22  | QHGPSGPRGPAGPHGPVGKD | 20     | 1903.94   | Non-Toxin | 0.7407               |

|    |                  |    |         |           |        |
|----|------------------|----|---------|-----------|--------|
| 23 | GPRGPAGPHGPPVVKD | 15 | 1397.72 | Non-Toxin | 0.7323 |
| 24 | GPSGRPGPAGPH     | 12 | 1085.54 | Non-Toxin | 0.7228 |
| 25 | AGPAGPRGSPGA     | 12 | 993.50  | Non-Toxin | 0.7158 |
| 26 | AGPRGASGPAGPR    | 13 | 1149.60 | Non-Toxin | 0.7083 |
| 27 | LGPAGPR          | 7  | 666.38  | Non-Toxin | 0.7051 |
| 28 | AGPAGPRGSPGAA    | 13 | 1064.54 | Non-Toxin | 0.7042 |
| 29 | NPSGPGGPTGKDGAGR | 16 | 1423.68 | Non-Toxin | 0.7015 |
| 30 | NPAGPAGPRGPSGE   | 14 | 1262.60 | Non-Toxin | 0.6959 |
| 31 | FGPGADNAGGK      | 11 | 989.46  | Non-Toxin | 0.6905 |
| 32 | QAGPAGPR         | 8  | 752.39  | Non-Toxin | 0.6836 |
| 33 | GPAGPRGPS        | 9  | 794.40  | Non-Toxin | 0.6819 |
| 34 | SGPAGPRGPSGS     | 12 | 1025.49 | Non-Toxin | 0.6793 |
| 35 | KAPDPLRGHGY      | 11 | 1209.63 | Non-Toxin | 0.6734 |
| 36 | AHGSPGPRGPAGPH   | 14 | 1293.63 | Non-Toxin | 0.6669 |
| 37 | QAGPAGPRGSPGAA   | 14 | 1192.59 | Non-Toxin | 0.6655 |
| 38 | QAGPAGPRGSPGA    | 13 | 1121.56 | Non-Toxin | 0.6639 |
| 39 | AAGPSGPRGPA      | 11 | 936.48  | Non-Toxin | 0.6616 |
| 40 | TGGPQGPLGPR      | 11 | 1035.55 | Non-Toxin | 0.6616 |
| 41 | GAHGSPGRPGPAGPH  | 15 | 1350.65 | Non-Toxin | 0.6548 |
| 42 | DFLK             | 5  | 634.37  | Non-Toxin | 0.6546 |
| 43 | NGGPSGPR         | 8  | 740.36  | Non-Toxin | 0.6483 |
| 44 | GPAGPRGPSGE      | 11 | 980.47  | Non-Toxin | 0.6449 |
| 45 | LDMLGPR          | 7  | 816.42  | Non-Toxin | 0.6436 |
| 46 | EAPDPLRN         | 8  | 910.45  | Non-Toxin | 0.6402 |
| 47 | GPSGPQGSRGEPGPN  | 15 | 1392.64 | Non-Toxin | 0.6373 |
| 48 | NVGEPGRLF        | 9  | 987.51  | Non-Toxin | 0.6275 |
| 49 | NNPDPLRGHGY      | 11 | 1238.58 | Non-Toxin | 0.6268 |
| 50 | QPPGPTGAP        | 9  | 820.41  | Non-Toxin | 0.6201 |
| 51 | KAPDPLRNHY       | 10 | 1209.63 | Non-Toxin | 0.6164 |
| 52 | QHGGSPRPGAGHP    | 15 | 1407.68 | Non-Toxin | 0.6138 |
| 53 | GPAGVRGPAGPA     | 12 | 1005.54 | Non-Toxin | 0.6103 |

**Table S3.** Results of TSP-II screened by AIPpred and AllerTOP 2.0.

| NO. | Peptide    | Length | Mass (Da) | AIP or Non-AIP | AIP Score | Allergenicity |
|-----|------------|--------|-----------|----------------|-----------|---------------|
| 1   | DFLLK      | 5      | 634.369   | AIP            | 0.6023    | Yes           |
| 2   | AGPEGPLGPR | 10     | 949.4981  | AIP            | 0.4767    | Yes           |
| 3   | DFCPPGFNTK | 10     | 1181.518  | AIP            | 0.4651    | No            |
| 4   | NVGEPGRLF  | 9      | 987.5137  | AIP            | 0.4581    | Yes           |
| 5   | EAPDPLRN   | 8      | 910.4508  | AIP            | 0.4558    | No            |
| 6   | SDFPALR    | 7      | 804.413   | AIP            | 0.4465    | Yes           |
| 7   | GPAGPRGPS  | 9      | 794.4034  | AIP            | 0.4372    | Yes           |
| 8   | AGPSGPAGRP | 10     | 865.4406  | AIP            | 0.4349    | Yes           |
| 9   | GPAGGPLGPR | 10     | 877.4769  | AIP            | 0.4349    | Yes           |
| 10  | KAPDPLRNHY | 10     | 1209.626  | AIP            | 0.4326    | Yes           |
| 11  | KAPDPF     | 6      | 673.3435  | AIP            | 0.4209    | Yes           |

|    |           |   |          |         |        |     |
|----|-----------|---|----------|---------|--------|-----|
| 12 | LGPAGPR   | 7 | 666.3813 | AIP     | 0.4116 | Yes |
| 13 | GPAGPRGPA | 9 | 778.4085 | AIP     | 0.3977 | Yes |
| 14 | QAGPAGPR  | 8 | 752.3929 | AIP     | 0.3907 | Yes |
| 15 | GPSGPRGPA | 9 | 794.4034 | AIP     | 0.3791 | Yes |
| 16 | NGGPSGPR  | 8 | 740.3565 | AIP     | 0.3767 | No  |
| 17 | LDMLGPR   | 7 | 816.4164 | AIP     | 0.3605 | Yes |
| 18 | VFPGLPDHL | 9 | 993.5283 | Non-AIP | 0.3465 | Yes |
| 19 | QPPGPTGAP | 9 | 820.4079 | Non-AIP | 0.2512 | Yes |
